# Supplementary material for: Phylogenetic profiling resolves early emergence of PRC2 and illuminates its functional core
Source: Life Sci Alliance. 2022 Apr 19;5(7):e202101271. doi: 10.26508/lsa.202101271 (PMC9018016; doi:10.26508/lsa.202101271)
Supplement: Supplementary file 3 [file LSA-2021-01271_TableS3.xlsx]

## Sheet: Table legends
Table	Title
Table S3	A list of species where all four PRC2 subunits were identified.

## Sheet: Table S3
Lineages	Scientific name	Taxon id
Discoba	-	2611352
Metamonada	-	2611341
Opisthokonta		33154
	Rhizophagus irregularis	588596
	Homo sapiens	9606
	Amphimedon queenslandica	400682
	Salpingoeca rosetta	946362
	Drosophila melanogaster	7227
Amoebozoa	-	2605435
Viridiplantae		33090
	Zostera marina	29655
	Amborella trichopoda	13333
	Populus trichocarpa	3694
	Selaginella moellendorffii	88036
	Physcomitrella patens	3218
	Ostreococcus tauri	70448
	Arabidopsis thaliana	3702
	Oryza sativa	4530
	Zea mays	4577
	Eucalyptus grandis	71139
Glaucocystophyceae	-	38254
Rhodophyta		2763
	Galdieria sulphuraria	130081
	Cyanidioschyzon merolae	45157
	Chondrus crispus	2769
Rhodelphea		2598125
	Rhodelphis limneticus	2584957
	Rhodelphis marinus	2583502
Cryptophyceae		3027
	Hemiselmis andersenii	464988
	Goniomonas pacifica	195067
	Guillardia theta	55529
	Geminigera cryophila	46947
Haptophyta	-	2830				`
Rhizaria		543769
	Bigelowiella natans	227086
	Plasmodiophora brassicae	37360
	Elphidium margaritaceum	933848
	Gymnochlora sp. CCMP2014	629695
Alveolata		33630
	Colponemidia sp Colp 10	2717461
	Colponemidia sp Colp 15	2717462
Stramenopila		33634
	Cafileria marina	2557541
	Triparma pacifica	91992
	Chrysoreinhardia sp. CCMP2950	1411690
	Attheya septentrionalis	420275
	Thalassionema nitzschioides	33649
	Conticribra weissflogii	1577725
	Bremia lactucae	4779
	Peronospora effusa	542832
	Nothophytophthora Chile5	2025987
	Rhizochromulina marina	1034831
	Vaucheria litorea	109269
	Thalassiosira pseudonana	35128
	Coscinodiscus wailesii	671091
	Aureoumbra lagunensis	44058
	Corethron hystrix	216773
	Chaetoceros debilis	122233
	Astrosyne radiata	1158023
	Pelagococcus subviridis	35679
	Pythium brassicum	1485010
	Phytophthora sojae	67593
	Cafeteria roenbergensis	33653
	Cyclotella meneghiniana	29205
	Rhizosolenia setigera	3005
	Pedinellales sp. CCMP2098	483369
	Proboscia alata	216777
	uncultured Leukarachnion	1487845
