# Supplementary material for: Phylogenetic profiling resolves early emergence of PRC2 and illuminates its functional core
Source: Life Sci Alliance. 2022 Apr 19;5(7):e202101271. doi: 10.26508/lsa.202101271 (PMC9018016; doi:10.26508/lsa.202101271)
Supplement: Supplementary file 6 [file LSA-2021-01271_TableS6.xlsx]

## Sheet: Table legends
Table	Title
Table S6	A list of numbers, names and domain architecture of identified ESC orthologs.

## Sheet: Table S6
Lineages	Scientific name	Taxon id	ESC Orthologs number	ESC Orthologs protein id	Domain architecture
Discoba		2611352
	Percolomonas cosmopolitus	63605	0
	Naegleria gruberi	5762	1	jgi_Naegr1_63593_fgeneshNG_pg_scaffold_7000125	WD40_4|WD40|Pfam_ANAPC4_WD40
	unclassified Diplonema	2647757	1	TRINITY_DN11262_c1_g6_i3_p1	WD40_4|WD40|Pfam_ANAPC4_WD40|Pfam_WD40_like|Pfam_Nup160|Pfam_Ge1_WD40|Pfam_eIF2A
	Diplonema papillatum	91374	0
	Neobodo designis	312471	0
	Leishmania mexicana	5665	0
	Trypanosoma brucei brucei TREU927	185431	0
	Eutreptiella gymnastica	73025	0
	Euglena longa	3037	0
	Euglena gracilis var. bacillaris	158060	0
Metamonada		2611341
	Trimastix marina	137419	0
	Monocercomonoides	302781	0
	Streblomastix strix	222440	0
	Tritrichomonas foetus	1144522	0
	Trichomonas tenax	43075	0
	Trichomonas gallinae	56777	0
	Trichomonas vaginalis G3	412133	0
	Chilomastix cuspidata	1476591	0
	Chilomastix caulleryi	926448	0
	Spironucleus salmonicida	348837	0
	Giardia muris	5742	0
	Giardia lamblia ATCC 50803	184922	0
	Giardia intestinalis ATCC 50581	598745	0
	Ergobibamus cyprinoides	926446	0
	Dysnectes brevis	391066	0
	Kipferlia bialata	797122	0
	unclassified Carpediemonas	2629244	0
	Carpediemonas membranifera	201153	1	Carpediemonas_membranifera_Gene.9777::gnl	WD40_4|WD40|Pfam_DUF1513
	Trepomonas sp. PC1	1076344	0
Opisthokonta		33154
	Salpingoeca rosetta	946362	1	XP_004996458.1	WD40_4|WD40
	Monosiga brevicollis	81824	1	XP_001746355.1	WD40_4|WD40
	Amphimedon queenslandica	400682	3	XP_019861500_1	WD40_4|WD40
				XP_019854033_1	WD40_4|WD40|Pfam_DUF1859
				XP_019860194_1	WD40_4|WD40|Pfam_Nup160|Pfam_ANAPC4_WD40|Pfam_DUF1859
	Homo sapiens	9606	1	NP_003788.2	WD40_4|Pfam_ANAPC4_WD40|Pfam_Nup160
	Caenorhabditis elegans	6239	1	NP_001370414.1	WD40_4|WD40
	Drosophila melanogaster	7227	2	NP_477431.1	WD40_4|Pfam_ANAPC4_WD40
				NP_723702.1	WD40_4|Pfam_ANAPC4_WD40|Pfam_dsrm
	Antonospora locustae	278021	1	jgi_Antlo1_1858_2297	WD40_4|WD40|Pfam_ANAPC4_WD40|Pfam_Nup160
	Nematocida parisii	586133	0
	Mortierella elongata	310910	1	jgi_Morel2_80886_Morel1_e_gw1_70_10_1	WD40_4|WD40|Pfam_Nup160|Pfam_ANAPC4_WD40|Pfam_STAT_bind
	Rhizophagus irregularis	588596	5	XP_025164603.1	WD40_4|WD40|Pfam_ANAPC4_WD40|Pfam_AFT
				XP_025177904.1	WD40_4|WD40|Pfam_ANAPC4_WD40
				XP_025175276.1	WD40_4|WD40|Pfam_Nup160|Pfam_Peptidase_S49_N|Pfam_DUF3446|Pfam_KdpC
				XP_025184061.1	WD40_4|WD40|Mre11_DNA_bind_2
				XP_025178901.1	WD40_4|WD40|Pfam_WD40_like|Pfam_ANAPC4_WD40
	Phycomyces blakesleeanus	4837	1	jgi_Phybl2_80559_Phybl1_estExt_fgeneshPB_pg_C_720005	WD40_4|WD40|Pfam_ANAPC4_WD40|Pfam_WD40_like|Pfam_Nup160|Pfam_eIF2A|ire1_9|Pfam_DUF5046|Pfam_RAB3GAP2_N
	Mucor circinelloides	36080	1	jgi_Mucci2_105976_Genemark1_1739_g	WD40_4|WD40|Pfam_ANAPC4_WD40|Pfam_WD40_like|Pfam_RAB3GAP2_N|Pfam_Nup160|Pfam_Peptidase_S9_N|Pfam_Hira|ire1_9
	Schizosaccharomyces pombe	4896	0
	Saccharomyces cerevisiae	4932	0
	Tuber melanosporum	39416	1	jgi_Tubme1v2_6983_GSTUMT200004794001	WD40_4|WD40|Pfam_ANAPC4_WD40|ire1_9
	Neurospora crassa	5141	1	XP_962071_2	WD40_4|WD40|Pfam_ANAPC4_WD40|Pfam_DUF4680
	Cladonia grayi	27339	0
	Tremella mesenterica	5217	0
	Cryptococcus neoformans	5207	1	jgi_Cryne_JEC21_1_4390_CNE02030_t01	WD40_4|Pfam_FAD_binding_8
	Phanerochaete chrysosporium	5306	1	jgi_Phchr2_2936879_estExt_Genewise1_C_11_t20432	WD40
	Postia placenta	104341	1	jgi_Possti1_382976_CE382975_3261	WD40_4|WD40|Cation_ATPase_N_a_2
	Pleurotus ostreatus	5322	1	jgi_PleosPC15_2_155520_genemark_3385_g	WD40_4|WD40
	Laccaria amethystina	89243	1	jgi_Lacam2_130308_Lacam1_fgenesh1_pm_24_16	WD40
	Agaricus bisporus	5341	1	jgi_Agabi_varbisH97_2_114404_Genemark_872_g	WD40_4
	Schizophyllum commune	5334	1	jgi_Schco3_2166495_CE166495_7800	WD40_4|WD40
Amoebozoa		2605435
	Entamoeba histolytica	5759	0
	Dictyostelium purpureum	5786	0
Viridiplantae		33090
	Ostreococcus tauri	70448	1	jgi_Ostta4221_3_72049_OT_ostta17g00590T0	WD40_4|WD40
	Micromonas pusilla	38833	1	jgi_MicpuC3v2_3544_wlab_214136_1	WD40_4|WD40|Pfam_ANAPC4_WD40
	Chlamydomonas reinhardtii	3055	1	PNW71199_1	WD40_4|WD40|Pfam_ANAPC4_WD40
	Volvox carteri	3067	2	jgi_Volca1_58949_e_gw1_12_10_1	WD40_4|WD40|Pfam_Ge1_WD40
				jgi_Volca1_120350_estExt_fgenesh5_synt_C_40050	WD40_4|WD40|Pfam_RVT_1|Pfam_ANAPC4_WD40
	Coccomyxa subellipsoidea C-169	574566	1	jgi_Coc_C169_1_11511_e_gw1_1_409_1	WD40_4|WD40|Pfam_Nup160|Pfam_ANAPC4_WD40
	Asterochloris sp. Cgr/DA1pho	763042	1	jgi_Astpho2_4318_e_gw1_00065_23_1_t	WD40_4|WD40|Pfam_Nup160|Pfam_Nucleoporin_N
	Chlorella variabilis	554065	2	XP_005851629.1	WD40_4|WD40|Pfam_Nup160|Pfam_ANAPC4_WD40|Pfam_Frtz|Pfam_SWIM
				XP_005851303.1	WD40_4|WD40|Pfam_Nup160|Pfam_BBS2_N|Pfam_Nbas_N
	Physcomitrium patens	3218	1	XP_024363274.1	WD40_4|WD40|Pfam_ANAPC4_WD40|Pfam_Ge1_WD40|tecpr
	Selaginella moellendorffii	88036	2	jgi_Selmo1_179301_estExt_Genewise1Plus_C_520051	WD40_4|WD40|Pfam_Kelch_2|Pfam_ANAPC4_WD40
				jgi_Selmo1_143777_estExt_Genewise1_C_70151	WD40_4|WD40|Pfam_Kelch_2|Pfam_ANAPC4_WD40
	Amborella trichopoda	13333	1	XP_011620319_1	WD40_4|WD40|Pfam_ANAPC4_WD40|Pfam_Nup160
	Zostera marina	29655	1	Zosma180g00030_1	WD40_4|WD40
	Oryza sativa	4530	2	NP_001060953_1	WD40_4|WD40|Pfam_ANAPC4_WD40
				NP_001175372_1	WD40_4|WD40|tecpr|Pfam_CRT10
	Zea mays	4577	3	NP_001105181_1	WD40_4|WD40
				NP_001105182_1	WD40_4|WD40
				XP_023158000_1	WD40_4|WD40
	Populus trichocarpa	3694	1	XP_006370617.1	WD40_4|WD40|Pfam_DUF5478
	Arabidopsis thaliana	3702	1	AT3G20740.1	WD40_4|Pfam_Ge1_WD40|Pfam_Nup160|Pfam_ANAPC4_WD40
	Eucalyptus grandis	71139	1	Eucgr_F03425_1_p	WD40_4|WD40|Pfam_ANAPC4_WD40|Pfam_Ge1_WD40
Glaucocystophyceae		38254
	Cyanoptyche gloeocystis	77922	1	scaffold_JKHA_2007164_Cyanoptyche_gloeocystis	WD40_4|WD40|Pfam_Nup160
	Cyanophora paradoxa	2762	0
	Gloeochaete wittrockiana	38269	0
Rhodophyta		2763
	Chondrus crispus	2769	1	jgi_Chocri1_2747_XM_005714503_1	WD40_4|WD40|Pfam_ANAPC4_WD40|Pfam_Nup160|Pfam_SH3_2|ccc3
	Porphyra umbilicalis	2786	2	jgi_Porumb1_10194_rna11337	WD40_4|WD40|Pfam_Nup160|Pfam_ANAPC4_WD40
				jgi_Porumb1_4193_rna1446	WD40_4
	Cyanidioschyzon merolae	45157	1	jgi_Cyamer1_57941_XM_005536520_1	WD40_4|WD40|Pfam_ANAPC4_WD40|Pfam_Lactonase|Pfam_Nup160
	Galdieria sulphuraria	130081	1	jgi_Galsul1_5850_XM_005703522_1	WD40_4|WD40|Pfam_ANAPC4_WD40|Pfam_eIF2A|Pfam_Ge1_WD40|Pfam_Nup160
Rhodelphea		2598125
	Rhodelphis marinus	2584957	1	Rmarinus@m.29269	WD40_4|WD40|Pfam_ANAPC4_WD40
	Rhodelphis limneticus	2583502	5	TRINITY_DN6708_c0_g1TRINITY_DN6708_c0_g1_i1g_3036m_3036	WD40_4|WD40|Pfam_Nup160|Pfam_ANAPC4_WD40|psinew7
				g9353_t1	WD40_4|WD40|Pfam_ANAPC4_WD40|Pfam_Nup160
				g643_t1_1	WD40_4|WD40|Pfam_ANAPC4_WD40|Pfam_Nup160
				TRINITY_DN17666_c0_g1TRINITY_DN17666_c0_g1_i1g_11366m_11366	WD40_4
				TRINITY_DN468_c0_g1TRINITY_DN468_c0_g1_i1g_2554m_2554	WD40_4|WD40|Pfam_ANAPC4_WD40|Pfam_Nup160
Cryptophyceae		3027
	Cryptophyta sp.	1912852	0
	Goniomonas pacifica	195067	2	CAMPEP_0175813250	WD40_4|WD40|Pfam_ANAPC4_WD40|Pfam_Nup160|Pfam_Ge1_WD40
				CAMPEP_0175815068	WD40_4|WD40|Pfam_ANAPC4_WD40|Pfam_Nup160
	Hemiselmis andersenii	464988	1	CAMPEP_0114109548	WD40_4|WD40|Pfam_ANAPC4_WD40
	Cryptomonas paramecium	2898	0
	Rhodomonas salina	52970	0
	Proteomonas sulcata	77928	0
	Guillardia theta	55529	1	jgi_Guith1_81200_e_gw1_170_7_1	WD40_4|WD40|Pfam_ANAPC4_WD40|Pfam_Ge1_WD40
	Hanusia phi	3032	1	CAMPEP_0169491734	WD40_4|WD40|Pfam_ANAPC4_WD40|Pfam_Ge1_WD40
	Geminigera cryophila	46947	2	CAMPEP_0179441870	WD40_4|WD40|Pfam_ANAPC4_WD40
				CAMPEP_0179492188	WD40_4|WD40
Haptophyta		2830
	Chrysoculter rhomboideus	259385	0
	uncultured pavlovophyte	1291727	0
	Pavlova sp. CCMP459	298111	0
	Scyphosphaera apsteinii	418940	1	CAMPEP_0119307898	WD40_4|WD40|Pfam_ANAPC4_WD40
	Phaeocystis antarctica	33657	0
	Calcidiscus leptoporus	127549	0
	Coccolithus braarudii	221442	0
	Chrysochromulina tobinii	1460289	0
	Haptolina ericina	156174	1	CAMPEP_0181201280	WD40_4|WD40|Pfam_ANAPC4_WD40
	Prymnesium parvum	97485	2	CAMPEP_0182801886	WD40_4|WD40|Pfam_ANAPC4_WD40
				CAMPEP_0182839242	WD40_4|WD40
	Isochrysis galbana	37099	1	CAMPEP_0179828906	WD40_4|WD40|Pfam_ANAPC4_WD40
	Chrysotila carterae	13221	0
	Emiliania huxleyi	2903	1	jgi_Emihu1_462168_estExtDG_fgeneshEH_pg_C_110112	WD40_4|WD40|Pfam_ANAPC4_WD40|Pfam_Ge1_WD40|Pfam_Nbas_N
	Gephyrocapsa oceanica	38817	1	CAMPEP_0185289550	WD40_4|WD40|Pfam_ANAPC4_WD40|Pfam_Ge1_WD40|Pfam_Nbas_N
Rhizaria		543769
	Plasmodiophora brassicae	37360	1	CEO99024_1	WD40_4|WD40
	Minchinia chitonis	262233	0
	Sorites sp.	126664	0
	Elphidium margaritaceum	933848	1	CAMPEP_0202734802	WD40_4|WD40|Pfam_CPSF_A|Pfam_ANAPC4_WD40
	unclassified Rosalina	2617710	0
	unclassified Ammonia	2201984	0
	Chlorarachnion reptans	29199	0
	Chlorarachniophyceae sp. BC52	91329	1	CAMPEP_0184499692	WD40_4|WD40|Pfam_Nup160|Pfam_Dfp1_Him1_M
	Partenskyella glossopodia	552666	0
	Bigelowiella natans	227086	1	jgi_Bigna1_87296_estExt_fgenesh1_pg_C_180209	WD40_4|WD40|Pfam_NHase_beta|DUF1086_2|Pfam_SUIM_assoc
	Lotharella globosa	91324	1	CAMPEP_0114067426	WD40_4|WD40|Pfam_Nup160|Pfam_ANAPC4_WD40|Pfam_Pallilysin
	Amorphochlora amoebiformis	1561963	1	CAMPEP_0118609386	WD40_4|WD40|Pfam_ANAPC4_WD40
	Gymnochlora sp. CCMP2014	629695	1	CAMPEP_0167768666	WD40_4|WD40
Alveolata		33630
	Perkinsus marinus ATCC 50983	423536	0
	Perkinsus sp. BL 2016	2494336	0
	Colponema vietnamica	1492817	0
	Colponemidia sp. Colp-10	2717461	2	Gene_14252GILJ01007659_1g_14252m_14252	WD40_4|Pfam_ANAPC4_WD40|Pfam_Tim54|Pfam_DNApol_Exo|Pfam_DUF755|Pfam_Menin|Pfam_NST1|Pfam_DUF3807|Pfam_SEEEED|Pfam_SR-25|Pfam_CPSF100_C
				Gene_21877GILJ01012236_1g_21877m_21877	WD40_4|WD40|Pfam_ANAPC4_WD40
	Colponemidia sp. Colp-15	2717462	2	Gene_13091GILK01007094_1g_13091m_13091	WD40_4|Pfam_ANAPC4_WD40
				Gene_14573GILK01008002_1g_14573m_14573	WD40_4|WD40|Pfam_ANAPC4_WD40
	Chromera velia	505693	0
	Vitrella brassicaformis	1169539	0
	Alphamonas edax	2605704	0
	Colpodella angusta	1541798	0
	Voromonas pontica	333133	0
	Stentor coeruleus	5963	0
	Protocruzia adherens	223996	1	CAMPEP_0114977968	WD40_4|WD40|Pfam_ANAPC4_WD40|BING4CT_2
	Oxytricha trifallax	1172189	2	jgi_Oxytri1_3175064_rna7762	WD40_4|WD40|Pfam_Cauli_DNA-bind
				jgi_Oxytri1_3175567_rna5013	WD40_4|WD40|Pfam_ANAPC4_WD40
	Paramecium tetraurelia	5888	0
	Tetrahymena thermophila	5911	0
	Apicomplexa sp. symbiont X	2600146	0
	Haemoproteus tartakovskyi	707206	0
	Plasmodium falciparum	5833	0
	Babesia bigemina	5866	0
	Theileria annulata	5874	0
	Cytauxzoon felis	27996	0
	Eleutheroschizon duboscqi	2600145	0
	Rhytidocystis sp. ex Travisia forbesii	2600139	0
	Cryptosporidium muris	5808	0
	Eimeria falciformis	84963	0
	Toxoplasma gondii	5811	0
	Sarcocystis neurona	42890	0
	Selenidium pygospionis	2108191	0
	Digyalum oweni	2598973	1	Gene_51003GHVM01059880_1g_51003m_51003	WD40_4|WD40|Pfam_Nup160
	Gregarina niphandrodes	110365	0
	Siedleckia nematoides	2107685	0
	Cephaloidophora cf. communis	947086	0
	Ancora sagittata	1892433	0
	Lankesteria abbotti	340204	0
	Ascogregarina taiwanensis	158379	0
	Polyrhabdina sp. WS-2016	2600141	0
	Prorocentrum minimum	39449	0
	Dinophysis acuminata	47934	0
	Noctiluca scintillans	2966	0
	Oxyrrhis marina	2969	0
	Pyrocystis lunula	2972	1	CAMPEP_0198297212	WD40_4|Pfam_ANAPC4_WD40|Pfam_Nup160|Pfam_Ge1_WD40|Pfam_DUF725|Pfam_DUF3827
	Amoebophrya sp.	88552	0
	Symbiodinium microadriaticum	2951	0
	Pelagodinium beii	43686	0
	Polarella glacialis	89957	0
	Apocalathium aciculiferum	268820	0
	Scrippsiella trochoidea	71861	0
	Thoracosphaera heimii	2923	0
	Brandtodinium nutricula	1333877	0
	Lessardia elongata	210733	0
	Heterocapsa rotundata	89963	0
	Kryptoperidinium foliaceum	160619	0
	Durinskia baltica	400756	0
	Karenia brevis	156230	0
	Karlodinium veneficum	407301	0
	Gymnodinium catenatum	39447	0
	Togula jolla	285029	0
	Gyrodinium dominans	285985	0
	Amphidinium carterae	2961	0
	Lingulodinium polyedra	160621	0
	Crypthecodinium cohnii	2866	0
	Azadinium spinosum	632150	0
	Tripos fusus	2916	0
	Gambierdiscus australes	439317	0
	Pyrodinium bahamense	73915	0
	Protoceratium reticulatum	133427	0
	Alexandrium monilatum	311494	0
	Gonyaulax spinifera	66791	0
Stramenopila		33634
	Picophagus	2547585	0
	Hyphochytrium catenoides	42384	1	maker_scaffold353_cov575_snap_gene_0_28_mRNA_1	WD40_4|WD40|Pfam_ANAPC4_WD40|Pfam_Nup160
	Pinguiococcus pyrenoidosus	172671	0
	Schizocladia	196140	0
	uncultured Leukarachnion	1487845	2	leukarachnion_DN410_c0_g1_i1_p1	WD40_4|WD40|Pfam_ANAPC4_WD40|Pfam_Ge1_WD40|Pfam_CDC45|Pfam_Nop14|Pfam_Macoilin|Pfam_LAP1C|Pfam_Trypan_PARP|Pfam_TipE|Pfam_MCM_bind
				leukarachnion_DN410_c0_g1_i2_p2	WD40_4|WD40|Pfam_ANAPC4_WD40
	Pythium brassicum	1485010	1	TYZ62990.1	WD40_4|WD40|Pfam_ANAPC4_WD40
	Saprolegnia diclina	112098	0
	Saprolegnia parasitica	101203	0
	Nothophytophthora	2025987	2	RLN90381.1	WD40_4|WD40|Pfam_ANAPC4_WD40|Pfam_Tox-HDC
				RLN97349.1	WD40_4|WD40|Pfam_ANAPC4_WD40|Pfam_Tox-HDC
	Phytophthora sojae	67593	1	jgi_Physo3_552795_estExt_Genewise1Plus_C_1_t170135	WD40_4|WD40|Pfam_ANAPC4_WD40|Pfam_zf-C2H2_7
	Peronospora effusa	542832	1	RQM16650.1	WD40_4|WD40|Pfam_ANAPC4_WD40|Pfam_zf-C2H2_7
	Bremia lactucae	4779	1	TDH68391.1	WD40_4|WD40|Pfam_ANAPC4_WD40|Pfam_Nup160|Pfam_zf-C2H2_7
	Pelagophyceae sp.	1982007	0
	Sarcinochrysis sp. CCMP770	1411683	0
	Chrysoreinhardia sp. CCMP2950	1411690	1	CAMPEP_0185689520	WD40_4|WD40|Pfam_Nup160
	Aureococcus anophagefferens	44056	0
	Aureoumbra lagunensis	44058	1	CAMPEP_0197296750	WD40_4|WD40|Pfam_ANAPC4_WD40|Pfam_Nup160|Pfam_Ge1_WD40
	Pelagomonas calceolata	35677	1	CAMPEP_0195908600	WD40_4|WD40|Pfam_Nup160
	Pelagococcus subviridis	35679	1	CAMPEP_0195692948	WD40_4|WD40
	environmental samples	282481	0
	Cafileria marina	2557541	1	NODE_23164_length_341_cov_1_38112_p1	WD40_4
	Cafeteria roenbergensis	33653	1	KAA0148991.1	WD40_4|WD40|Pfam_ANAPC4_WD40|Pfam_PQQ_3
	labyrinthulid quahog parasite QPX	96639	0
	Aurantiochytrium limacinum	87102	1	jgi_Aurli1_136483_estExt_fgenesh1_kg_C_1_t10481	WD40_4|Pfam_ANAPC4_WD40|WD40|ire1_9
	Aplanochytrium kerguelense	87111	1	jgi_Aplke1_99120_estExt_fgenesh1_pg_C_190052	WD40_4|WD40|Pfam_ANAPC4_WD40|Pfam_WD40_like|Pfam_Mucin2_WxxW|ire1_9
	Schizochytrium aggregatum	4773	0
	Thraustochytrium sp. LLF1b	1112570	1	CAMPEP_0184509286	WD40_4|Pfam_ANAPC4_WD40|WD40|Pfam_Ge1_WD40|Pfam_PD40
	Synchroma pusillum	1181717	0
	Phaeothamnion	77033	1	phaeothamnionc4728_p1	WD40_4|WD40|Pfam_ANAPC4_WD40|Pfam_Nup160|PTB_9
	Triparma pacifica	91992	3	CAMPEP_0118643274	WD40_4|WD40|Pfam_ANAPC4_WD40
				CAMPEP_0118666374	WD40_4|WD40
				CAMPEP_0118672380	WD40_4|WD40
	Bolidomonas sp. RCC2347	1606585	0
	unclassified Mallomonas	2637965	1	CAMPEP_0182419830	WD40_4|WD40|Pfam_ANAPC4_WD40|Pfam_Nup160
	uncultured Poterioochromonas	341152	0
	Ochromonadaceae sp. CCMP2298	483371	0
	Vaucheria litorea	109269	3	CAMPEP_0171455442	WD40_4|WD40|Pfam_ANAPC4_WD40|Pfam_Nup160|Pfam_Nbas_N
				CAMPEP_0171469338	WD40_4|WD40|Pfam_ANAPC4_WD40|Pfam_WD40_like
				CAMPEP_0171455970	WD40_4|WD40|Pfam_ANAPC4_WD40|Pfam_WD40_like
	Ectocarpus siliculosus	2880	0
	unclassified Discosporangium	2642768	1	CAMPEP_0170070590	WD40_4|WD40
	Chattonella subsalsa	44440	1	CAMPEP_0117760890	WD40_4|WD40|Pfam_Nup160|Pfam_ANAPC4_WD40
	Fibrocapsa japonica	94617	2	CAMPEP_0113942536	WD40_4|WD40|Pfam_ANAPC4_WD40
				CAMPEP_0113947672	WD40_4
	Heterosigma akashiwo NIES-293	536047	0
	Rhizochromulina marina	1034831	1	CAMPEP_0118971152	WD40_4|WD40|Pfam_Nup160
	Florenciella parvula	236787	1	CAMPEP_0182522684	WD40|WD40_4|Pfam_ANAPC4_WD40
	Pedinellales sp. CCMP2098	483369	1	CAMPEP_0171637038	WD40_4|WD40|Pfam_ANAPC4_WD40|Pfam_AF-4|Pfam_PAP1
	Pteridomonas danica	38822	2	CAMPEP_0114332760	WD40_4|WD40|Pfam_ANAPC4_WD40|Proteasome_A_N_2
				CAMPEP_0114368856	WD40_4
	Pseudopedinella elastica	35684	2	CAMPEP_0172602052	WD40_4|WD40|Pfam_Nup160
				CAMPEP_0172588426	WD40_4|WD40
	unclassified Dinobryon	2640036	0
	Paraphysomonas imperforata	37642	0
	Chromulina nebulosa	96789	0
	Spumella elongata	89044	0
	Ochromonas sp. CCMP1899	420557	1	CAMPEP_0119054878	WD40_4|Pfam_DUF4303
	unclassified Trachydiscus	2641256	0
	Pseudellipsoidion	1435009	0
	unclassified Vischeria	2646287	0
	unclassified Monodopsis	2631382	1	CAMPEP_0119054878	WD40_4|WD40|Pfam_DUF4303
	Microchloropsis salina	2511165	0
	Nannochloropsis oceanica	145522	0
	Nannochloropsis gaditana CCMP526	1093141	0
	Extubocellulus spinifer	265572	1	CAMPEP_0178488580	WD40_4|WD40
	Minutocellus polymorphus	265543	2	CAMPEP_0181060354	WD40_4|WD40|Pfam_ANAPC4_WD40|Pfam_Nup160|Pfam_Ge1_WD40|Pfam_IMUP
				CAMPEP_0181020942	WD40_4|WD40|Pfam_ANAPC4_WD40|Pfam_Nup160|Pfam_Ge1_WD40
	Helicotheca tamesis	374047	0
	Ditylum brightwellii	49249	1	CAMPEP_0204673290	WD40_4|WD40
	Eucampia antarctica	49252	1	CAMPEP_0197826390	WD40_4|WD40|Pfam_ANAPC4_WD40|Pfam_VID27|Pfam_eIF2A|Pfam_PD40
	Triceratium dubium	1003142	0
	Trieres chinensis	1514140	0
	Grammatophora oceanica	210454	0
	Striatella unipunctata	210618	0
	Synedropsis cf. recta	265551	0
	Licmophora paradoxa	515479	1	CAMPEP_0202454304	WD40_4|WD40|Pfam_ANAPC4_WD40|Pfam_Nup160
	Thalassionema nitzschioides	33649	1	CAMPEP_0194217012	WD40_4|WD40|Pfam_ANAPC4_WD40
	Thalassiothrix antarctica	1049557	0
	Cyclophora tenuis	216820	1	CAMPEP_0116542002	WD40_4|WD40|Pfam_ANAPC4_WD40
	Astrosyne radiata	1158023	1	CAMPEP_0116826738	WD40_4|WD40|Pfam_ANAPC4_WD40|Pfam_Nup160|Pfam_Crystall_2
	Entomoneis sp.	186043	0
	Amphora coffeiformis	265554	0
	Craspedostauros australis	1486917	0
	Phaeodactylum tricornutum	2850	1	jgi_Phatr2_9860_e_gw1_2_211_1	WD40_4|WD40|Pfam_ANAPC4_WD40|Pfam_Nup160|Pfam_VID27|Pfam_DUF3678
	Amphiprora paludosa	265537	1	CAMPEP_0172470430	WD40_4|WD40|Pfam_Nup160|Pfam_PQQ_2
	Stauroneis constricta	265584	0
	Tryblionella compressa	913974	2	CAMPEP_0178765406	WD40_4|WD40|Pfam_ANAPC4_WD40|Pfam_Ge1_WD40|Pfam_Hira|Pfam_WD40_like
				CAMPEP_0178752342	WD40_4|WD40|Pfam_ANAPC4_WD40|LamNT_2
	Fragilariopsis cylindrus	186039	2	jgi_Fracy1_250562_fgenesh2_pg_31_161	WD40_4|WD40|Pfam_ANAPC4_WD40|Pfam_Hira|tecpr
				jgi_Fracy1_250868_fgenesh2_pg_33_34	WD40_4|WD40|Pfam_ANAPC4_WD40|Pfam_Hira|Pfam_Methyltransf_34
	Cylindrotheca closterium	2856	1	CAMPEP_0113602098	WD40_4|WD40|Pfam_ANAPC4_WD40
	Pseudo-nitzschia australis	44445	2	CAMPEP_0168185064	WD40_4|Pfam_ANAPC4_WD40|WD40|Pfam_EPL1|Pfam_DDHD|uba_6|Pfam_UBA|Pfam_eIF-3_zeta|Pfam_Connexin|Pfam_Eapp_C
				CAMPEP_0168167652	WD40_4|WD40|Pfam_ANAPC4_WD40|uba_6|Pfam_UBA
	Nitzschia sp. RCC80	1606575	0
	Corethron hystrix	216773	1	CAMPEP_0113322514	WD40_4|WD40|Pfam_ANAPC4_WD40
	Leptocylindrus danicus	163516	2	CAMPEP_0116005244	WD40_4|WD40|Pfam_ANAPC4_WD40|rrm1_1|Pfam_RRM_1
				CAMPEP_0116046614	WD40_4|WD40
	Chaetoceros debilis	122233	1	CAMPEP_0194094724	WD40_4|WD40|Pfam_ANAPC4_WD40
	Attheya septentrionalis	420275	1	CAMPEP_0198297212	WD40_4|WD40|Pfam_ANAPC4_WD40|Pfam_Nup160|Pfam_Ge1_WD40|Pfam_DUF725|Pfam_DUF3827
	Aulacoseira subarctica	202472	1	CAMPEP_0172425698	WD40_4|WD40|Pfam_ANAPC4_WD40|Pfam_Ge1_WD40|Pfam_VID27|Pfam_WD40_like|Pfam_Nucleoporin_N|Pfam_Nup160
	Coscinodiscus wailesii	671091	1	CAMPEP_0172508124	WD40_4|WD40|Pfam_Flot|UBA_e1_C_a_2
	Stephanopyxis turris	515487	1	CAMPEP_0195542180	WD40_4|WD40|Pfam_ANAPC4_WD40|Pfam_TMEM215|SynN_4|Pfam_Pex14_N
	Dactyliosolen fragilissimus	1118495	1	CAMPEP_0184867224	WD40_4|WD40|Pfam_ANAPC4_WD40|Pfam_Roc|Pfam_eIF2A
	Proboscia alata	216777	1	CAMPEP_0194355536	WD40_4|WD40|Pfam_ANAPC4_WD40
	Rhizosolenia setigera	3005	1	CAMPEP_0178950908	WD40_4|WD40|Pfam_ATP-synt_S1
	Cyclotella meneghiniana	29205	1	CAMPEP_0172290244	WD40_4|WD40|Pfam_ANAPC4_WD40|Pfam_STAT2_C
	Skeletonema costatum	2843	1	CAMPEP_0113424720	WD40_4|WD40|Pfam_ANAPC4_WD40|Pfam_Nup160
	Conticribra weissflogii	1577725	1	CAMPEP_0201755208	WD40_4|WD40|Pfam_ANAPC4_WD40
	Thalassiosira pseudonana	35128	1	jgi_Thaps3_270065_estExt_thaps1_ua_kg_C_chr_220025	WD40_4|WD40|Pfam_ANAPC4_WD40
	Detonula confervacea	83371	1	CAMPEP_0172321246	WD40_4|WD40|Pfam_ANAPC4_WD40
