# Supplementary material for: Phylogenetic profiling resolves early emergence of PRC2 and illuminates its functional core
Source: Life Sci Alliance. 2022 Apr 19;5(7):e202101271. doi: 10.26508/lsa.202101271 (PMC9018016; doi:10.26508/lsa.202101271)
Supplement: Supplementary file 10 [file LSA-2021-01271_TableS10.xlsx]

## Sheet: Table legends
Table	Title
Table S10	A list of E(z) sequences representative of the Clades I-V, showing taxonomic information, sequences names and domain architecture.

## Sheet: Table S10
Clades	Lineages	Organisms	Master sequence(s)	Domain architecture
Clade I	Discoba	Euglena longa	GGOE01015235_1_p1_3037_Euglena_longa	SET
				364-470
	Opisthokonta	Stereum hirsutum	40492_XP_007304212_1_KOG_Stereum_hirsutum	SET
				578-688
	Opisthokonta	Schizophyllum commune	e_gw1.8.139.1_5334_Schizophyllum_commune	SET
				499-646
	Opisthokonta	Punctularia strigosozonata	202698_XP_007379994_1_KOG_Punctularia_strigosozonata	SET
				487-593
	Opisthokonta	Fomitiporia mediterranea	208960_XP_007263647_1_KOG_Fomitiporia_mediterranea	SET
				571-677
	Opisthokonta	Pleurotus ostreatus	fgenesh2_pg.9_135_5322_Pleurotus_ostreatus	SET
				544-672
	Opisthokonta	Phanerochaete chrysosporium	Phchr2_2904420_e_gw1_5_947_1_5306_Phanerochaete_chrysosporium	SET
				488-594
	Opisthokonta	Coniophora puteana	80637_XP_007769382_1_KOG_Coniophora_puteana	CXC	SET
				521-555	584-697
	Opisthokonta	Spizellomyces punctatus	109760.SPPG_03589T0_Spizellomyces_punctatus	CXC	SET
				500-527	565-674
	Opisthokonta	Auricularia delicata	160860_XP_007350139_1_KOG_Auricularia_delicata	SET	GMC_oxred_N	GMC_oxred_C
				506-614	633-942	1071-1208
Clade II	Alveolata	Paramecium tetraurelia	XM_001436793.1_5888_Paramecium_tetraurelia	SET
				459-568
			XM_001444549.1_5888_Paramecium_tetraurelia	SET
				555-661
			XM_001445199.1_5888_Paramecium_tetraurelia	SET
				555-661
	Discoba	Naegleria gruberi	66167_5762_Naegleria_gruberi	SET
				555-668
	Alveolata	Stentor coeruleus	OMJ88159_1_5963_Stentor_coeruleus	CXC	SET
				401-433	479-587
	Alveolata	Tetrahymena thermophila	XM_001024559.2_5911_Tetrahymena_thermophila	CXC	SET
				521-552	549-687
	Opisthokonta	Caenorhabditis remanei	31234_CRE14322_KOG_Caenorhabditis_remanei	CXC	SET
				543-575	609-714
Clade III	Rhodophyta	Chondrus crispus	XM_005710962.1_2769_Chondrus_crispus	SET
				622-729
	Apusozoa	Thecamonas trahens	529818.AMSG_09360T0_KOG_Thecamonas_trahens	CXC	SET
				522-559	669-790
	Rhodophyta	Cyanidioschyzon merolae	XM_005538039.1_45157_Cyanidioschyzon_merolae	CXC	SET
				583-614	646-754
	Rhodelphea	Rhodelphis limneticus	g3045.t1_2583502_Rhodelphis_limneticus	CXC	SET
				3-21	80-123
	Rhodelphea	Rhodelphis marinus	Rmarinus_m.26795_2584957_Rhodelphis_marinus	CXC	SET
				629-661	698-802
	Rhodophyta	Porphyra umbilicalis	rna5393_2786_Porphyra_umbilicalis	CXC	SET
				1313-1346	1427-1532
			rna3925_2786_Porphyra_umbilicalis	CXC	SET
				86-119	201-306
	Rhodophyta	Galdieria sulphuraria	XM_005708739.1_130081_Galdieria_sulphuraria	SANT	SET
				503-552	679-800
Clade VI	Stramenopila	Peronospora effusa	RQM13285.1_542832_Peronospora_effusa	SET
				78-144
			RQM13283.1_542832_Peronospora_effusa	SET
				5-85
	Stramenopila	Bicosoecid sp	CAMPEP_0203834124_282481_Bicosoecid_sp	SET
				1056-1162
	Stramenopila	Aureoumbra lagunensis	CAMPEP_0197302078_44058_Aureoumbra_lagunensis	CXC	SET
				399-435	455-577
	Stramenopila	Pteridomonas danica	CAMPEP_0114363756_38822_Pteridomonas_danica	CXC	SET
				845-942	682-714
	Stramenopila	Albugo laibachii	653948_CCA13907_KOG_Albugo_laibachii	CXC	SET
				788-820	859-964
			653948_CCA25125_KOG_Albugo_laibachii	CXC	SET
				908-940	987-1093
	Stramenopila	Pythium brassicum	TYZ63345.1_1485010_Pythium_brassicum	CXC	SET
				890-922	967-1072
	Stramenopila	Hyaloperonospora arabidopsidis	272952_HpaP809643_KOG_Hyaloperonospora_arabidopsidis	CXC	SET
				844-876	921-1026
			272952_HpaP809827_KOG_Hyaloperonospora_arabidopsidis	CXC	SET
				1267-1299	1345-1451
	Stramenopila	Phytophthora parasitica	4792_ETI47281_KOG_Phytophthora_parasitica	CXC	SET
				838-870	915-1020
	Stramenopila	Bremia lactucae	TDH69009.1_4779_Bremia_lactucae	CXC	SET
				1227-1259	1305-1411
	Stramenopila	Phytophthora parasitica	4792_ETI39152_KOG_Phytophthora_parasitica	CXC	SET
				1201-1233	1279-1385
	Alveolata	Colponemidia sp Colp 15	Gene_10742GILK01005756_1g_10742m_10742_2717461_Colponemidia_sp_Colp_15	CXC	SET
				539-571	607-711
	Stramenopila	Pinguiococcus pyrenoidosus	CAMPEP_0197371084_172671_Pinguiococcus_pyrenoidosus	CXC	SET
				462-502	554-675
	Stramenopila	Hyphochytrium catenoides	maker_scaffold375_cov627_augustus_gene_0_2_mRNA_1_42384_Hyphochytrium_catenoides	CXC	SET
				507-539	625-729
	Stramenopila	leukarachnion sp	lDN4985_c0_g1_i1_p1_1487823_leukarachnion_Sp	SANT	CXC	SET
				647-695	802-838	893-1014
	Stramenopila	Pelagococcus subviridis	CAMPEP_0172606526_35679_Pelagococcus_subviridis	CXC	ZnF_C2HC	SET
				1248-1287	1279-1295	1403-1522
Clade V	Stramenopila	Cafileria marina	6971_2557541_Cafileria_marina	SET
				813-939
	Rhizaria	Elphidium margaritaceum	CAMPEP_0202732800_933848_Elphidium_margaritaceum	SET
				701-806
	Rhizaria	Chlorarachniophyceae sp BC52	CAMPEP_0184504454_91329_Chlorarachniophyceae_sp_BC52	SET
				701-806
	Stramenopila	Proboscia alata	CAMPEP_0194359056_216777_Proboscia_alata	SET
				2307-2411
	Viridiplantae	Auxenochlorella protothecoides	3075_A0A087SDT9_KOG_Auxenochlorella_protothecoides	SET
				490-594
	Alveolata	Protocruzia adherens	CAMPEP_0114997746_223996_Protocruzia_adherens	SET
				313-420
	Viridiplantae	Amborella trichopoda	XP_020526625_1_13333_Amborella_trichopoda	CXC	SET
				741-773	814-918
	Stramenopila	Pythium iwayamai	115417_EPrPW00000023678_KOG_Pythium_iwayamai	CXC	SET
				546-577	638-743
	Viridiplantae	Leersia perrieri	77586_LPERR03G12960_1_KOG_Leersia_perrieri	SANT	SET
				515-565	637-808
	Viridiplantae	Arabidopsis thaliana	AT2G23380_CLF_3702_Arabidopsis_thaliana	SANT	CXC	SET
				531-581	686-723	752-873
	Viridiplantae	Bathycoccus prasinos	41875_XP_007509828_1_KOG_Bathycoccus_prasinos	CXC	CXC	SET
				1097-1138	1139-1170	1227-1348
	Opisthokonta	Microplitis demolitor	69319_XP_008556240_1_KOG_Microplitis_demolitor	Pfam_PRC2_HTH_1	CXC	SET
				149-233	533-564	596-700
	Opisthokonta	Drosophila melanogaster	NP_001137932.1_7227_Drosophila_melanogaster	Pfam_PRC2_HTH_1	SANT	CXC	SET
				151-291	443-491	574-605	637-741
	Opisthokonta	Homo sapiens	NP_001982.2_EZH1_9606_Homo_sapiens	Pfam_EZH2_WD-Binding	Pfam_PRC2_HTH_1	SANT	CXC	SET
				39-68	159-262	430-478	560-591	624-728
			NP_001190176.1_EZH2_9606_Homo_sapiens	Pfam_EZH2_WD-Binding	Pfam_PRC2_HTH_1	SANT	CXC	SET
				39-68	158-249	428-476	559-590	623-727
