# Supplementary material for: Phylogenetic profiling resolves early emergence of PRC2 and illuminates its functional core
Source: Life Sci Alliance. 2022 Apr 19;5(7):e202101271. doi: 10.26508/lsa.202101271 (PMC9018016; doi:10.26508/lsa.202101271)
Supplement: Supplementary file 11 [file LSA-2021-01271_TableS11.xlsx]

## Sheet: Table legends
Table	Title
Table S11	A list of numbers, names and domain architecture of identified E(z) orthologs in all prokaryotes (Bacteria, Archaea and Asgard).

## Sheet: Table S11
Superkingdom	Phylum/group	Scientific name	Taxon id	SET_Orthologous number	SET_Orthologous protein id	Domain architecture
Bacteria	Chlamydiae/Verrucomicrobia group	Akkermansia muciniphila ATCC BAA-835	349741	0
		Coraliomargarita akajimensis DSM 45221	583355	2	WP_013043985_1	SET|PostSET_3
					WP_013044412_1	SET
		Opitutus terrae PB90-1	452637	1	WP_052300471_1	SET|SAF_3|PostSET_3|Pfam_SAF
		Chlamydia gallinacea	1143323	1	M787_0612	SET
	Thermotogae	Fervidobacterium nodosum Rt17-B1	381764	0
		Kosmotoga olearia TBF 19.5.1	521045	0
		Thermosipho melanesiensis BI429	391009	0
	Tenericutes	Acholeplasma laidlawii PG-8A	441768	0
		Onion yellows phytoplasma OY-M	262768	0
	Aquificae	Sulfurihydrogenibium sp. YO3AOP1	436114	0
		Thermocrinis albus DSM 14484	638303	0
		Hydrogenobaculum sp. Y04AAS1	380749	0
	Spirochaetes	Spirochaeta africana DSM 8902	889378	0
		Salinispira pacifica	1307761	0
		Sphaerochaeta globosa str. Buddy	158189	0
		Spirochaeta bajacaliforniensis	1123274	1	1123274.KB899408_gene3855	SET
		Spirochaeta smaragdinae	573413	1	Spirs_0523	SET
	Deinococcus-Thermus	Deinococcus deserti VCD115	546414	0
		Thermus scotoductus SA-01	743525	0
		Oceanithermus profundus DSM 14977	670487	0
	Actinobacteria	Olsenella uli DSM 7084	633147	0
		Adlercreutzia equolifaciens DSM 19450	1384484	0
		Cutibacterium avidum 44067	1170318	0
		Ilumatobacter coccineus YM16-304	1313172	0
		Amycolatopsis balhimycina	1089545	1	1089545.KB913037_gene980	SET|PostSET_3
		Nocardioides sp.	110319	1	110319.CF8_4192	SET|PostSET_3
		Arthrobacter castelli	1121019	1	1121019.AUMN01000020_gene1659	SET|PostSET_3|SAF_3|Pfam_SAF
	Firmicutes	Clostridium perfringens SM101	289380	0
		Paenibacillus polymyxa CR1	1429244	0
		Dehalobacter sp. DCA	1147129	0
		Solibacillus silvestris	1002809	2	1002809.SSIL_3492	SET
					1002809.SSIL_2018	SET
		Sporosarcina newyorkensis	1027292	1	1027292.HMPREF9372_2869	SET|Pfam_SAF|Pfam_TTD|SAF_3
		Bacillus timonensis	1033734	1	1033734.CAET01000007_gene3805	SET|Pfam_TTD|Pfam_SAF|SAF_3
	Bacteroidetes/Chlorobi group	Psychroflexus torquis ATCC 700755	313595	0
		Bacteroides fragilis NCTC 9343	272559	0
		Niastella koreensis GR20-10	700598	1	WP_014216647_1	SET|Pfam_Mltc_N
		Aequorivita capsosiphonis	1120951	1	1120951.AUBG01000007_gene270	SET|Pfam_SAF|SAF_3|Pfam_Nsp1_C
		Aquimarina muelleri	1121007	1	1121007.AUML01000016_gene200	SET|Pfam_Nsp1_C
	Chloroflexi	Caldilinea aerophila DSM 14535 = NBRC 104270	926550	0
		Anaerolinea thermophila UNI-1	926569	0
		Longilinea arvoryzae	360412	0
		Chloroflexus aggregans DSM 9485	326427	0
		Herpetosiphon aurantiacus	316274	1	316274.Haur_1893	SET
	Fusobacteria	Sebaldella termitidis ATCC 33386	526218	0
		Leptotrichia buccalis C-1013-b	523794	0
		Fusobacterium nucleatum subsp. vincentii 3_1_36A2	469604	0
	Fibrobacteres/Acidobacteria group	Candidatus Solibacter usitatus Ellin6076	234267	1	WP_011688822_1	SET|PostSET_3
		Fibrobacter succinogenes subsp. succinogenes S85	59374	0
		Terriglobus roseus DSM 18391	926566	1	WP_014785958_1	SET|PostSET_3
		Elusimicrobium minutum Pei191	445932	0
		Granulicella tundricola	1198114	1	1198114.AciX9_1920	SET|PostSET_3|SAF_3|
	Nitrospirae	Nitrospira defluvii	330214	0
		Leptospirillum ferriphilum ML-04	1048260	0
		Thermodesulfovibrio yellowstonii DSM 11347	289376	0
	Dictyoglomi	Dictyoglomus turgidum DSM 6724	515635	0
		Dictyoglomus thermophilum H-6-12	309799	0
	Gemmatimonadetes	Gemmatimonas aurantiaca T-27	379066	2	WP_156799250_1	SET|PostSET_3|Pfam_DUF4192Pfam_SseC
					WP_041265726_1	SET|PostSET_3
	Synergistetes	Aminobacterium colombiense DSM 12261	572547	0
		Thermanaerovibrio acidaminovorans DSM 6589	525903	0
	Planctomycetes	Phycisphaera mikurensis NBRC 102666	1142394	0
		Planctopirus limnophila DSM 3776	521674	0
		Schlesneria paludicola	1123242	1	1123242.JH636438_gene5677	SET|PostSET_3|Pfam_SAF|SAF_3
		Rhodopirellula baltica	243090	1	243090.RB7452	SET|PostSET_3
		Blastopirellula marina	314230	1	314230.DSM3645_25507	SET|PostSET_3
	Deferribacteres	Denitrovibrio acetiphilus DSM 12809	522772	0
		Deferribacter desulfuricans SSM1	639282	0
		Flexistipes sinusarabici DSM 4947	717231	0
	Chrysiogenetes	Desulfurispirillum indicum S5	653733	0
		Chrysiogenes arsenatis	118005	1	118005.AWNK01000009_gene227	SET
	Thermodesulfobacteria	Thermodesulfobacterium geofontis OPF15	795359	0
		Thermodesulfatator indicus DSM 15286	667014	0
	Caldiserica	Caldisericum exile AZM16c01	511051	0
	Gammaproteobacteria	Actinobacillus pleuropneumoniae serovar 3 str. JL03	434271	0
		Aeromonas hydrophila ML09-119	1288394	0
		Alteromonas mediterranea U8	1300257	0
		Endozoicomonas montiporae	1027273	1	1027273.GZ77_20280	SET
		Legionella massiliensis	1034943	1	1034943.BN1094_01876	SET
		Pseudomonas fluorescens	1042209	1	1042209.HK44_023495	SET|PostSET_3
	Alphaproteobacteria	Agrobacterium radiobacter K84	311403	0
		Acetobacter pasteurianus IFO 3283-01	634452	0
		Acidiphilium cryptum JF-5	349163	0
		Anaplasma marginale str. Florida	320483	0
		Asticcacaulis excentricus CB 48	573065	0
		Phaeobacter gallaeciensis	1002340	1	1002340.AFCF01000027_gene1280	SET
		Bradyrhizobium elkanii	1038859	1	1038859.AXAU01000009_gene1561	SET
		Novosphingobium pentaromativorans	1088721	1	1088721.NSU_0587	SET
		Candidatus Pelagibacter	1096769	1	1096769.Pelub83DRAFT_0775	Pfam_Omptin|SET|PostSET_3
	delta/epsilon subdivisions	Anaeromyxobacter dehalogenans 2CP-1	455488	0
		Halobacteriovorax marinus SJ	862908	0
		Bdellovibrio bacteriovorus str. Tiberius	1069642	0
		Desulfobacter curvatus	1121396	1	1121396.KB893120_gene3073	SET|PostSET_3
		Sorangium cellulosum	1254432	1	1254432.SCE1572_02605	Pfam_Ank_2|SET
		Stigmatella aurantiaca	378806	1	378806.STAUR_2939	Pfam_Ank|ANK_2a|SET|PostSET_3
	Betaproteobacteria	Achromobacter xylosoxidans A8	762376	1	WP_020925722_1	SET|Pfam_SAF|SAF_3|PostSET_3
		Acidovorax avenae subsp. avenae ATCC 19860	643561	1	WP_013596903_1	SET|PostSET_3|Pfam_SAF
		Alicycliphilus denitrificans BC	596153	1	WP_013520942_1	SET|PostSET_3|Pfam_SAF|SAF_3
	Cyanobacteria	Trichormus variabilis ATCC 29413	240292	0
		Geitlerinema sp. PCC 7407	1173025	0
		Rippkaea orientalis PCC 8801	41431	0
		Nostoc sp. PCC 7107	317936	2	WP_094330776_1	SET
					WP_104909225_1	SET
		Rivularia sp. PCC 7116	373994	0
		Leptolyngbya sp.	102129	1	102129.Lepto7375DRAFT_1935	SET
		filamentous cyanobacterium	1128427	1	1128427.KB904821_gene2299	SET|lamegf_3|PostSET_3
		Gloeocapsa sp.	1173026	1	1173026.Glo7428_0554	PostSET_3|SET
		Oscillatoria sp.	1173028	1	1173028.ANKO01000080_gene4659	Pfam_Ank_4|Pfam_Ank_5|Pfam_Ank_3|SET|Pfam_ROK|PostSET_3
Archaea	Crenarchaeota	Acidilobus saccharovorans 345-15	666510	0
		Caldisphaera lagunensis DSM 15908	1056495	0
		Caldivirga maquilingensis IC-167	397948	0
	Nanoarchaeota	Rubinisphaera brasiliensis DSM 5305	756272	0
		Nanoarchaeum equitans Kin4-M	228908	0
	Thaumarchaeota	Nitrosopumilus maritimus SCM1	436308	0
		Candidatus Nitrosopumilus sediminis	1229909	0
		Candidatus Nitrososphaera gargensis Ga9.2	1237085	0
	Korarchaeota	Candidatus Korarchaeum cryptofilum OPF8	374847	0
	Euryarchaeota	Aciduliprofundum sp. MAR08-339	673860	0
		Aciduliprofundum boonei T469	439481	0
		Pyrococcus horikoshii OT3	70601	0
		Methanosarcina mazei	192952	1	192952.MM_2845	Pfam_DUF2083|SET|Pfam_TTD
		Methanoculleus marisnigri	368407	1	WP_011843504.1	PostSET_3|SET
		Methanoregula formicica	593750	1	AGB01655.1	Pfam_DUF2897|SET
Asgard		Candidatus Heimdallarchaeota archaeon	2026747	0
		Candidatus Helarchaeota ASGARD archaeon Hel_GB_A	2218536	0
		Candidatus Lokiarchaeota archaeon	2053489	1	TFG06932_1	SET|Pfam_SAF|SAF_3|chw
		Candidatus Prometheoarchaeum syntrophicum	2594042	0
		Candidatus Odinarchaeota archaeon LCB_4	1841599	0
		Candidatus Thorarchaeota archaeon	2053491	0
